# Supplementary material
Source: Springer Nature journal article supplement (https://www.springermedizin.de/resource/supplementary/12997_2010_66_MOESM6_ESM.pdf/9623250)

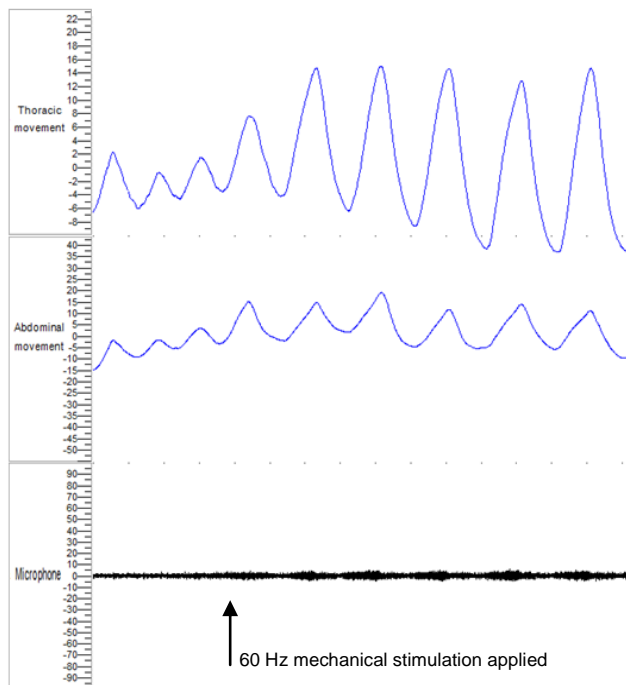

**A**

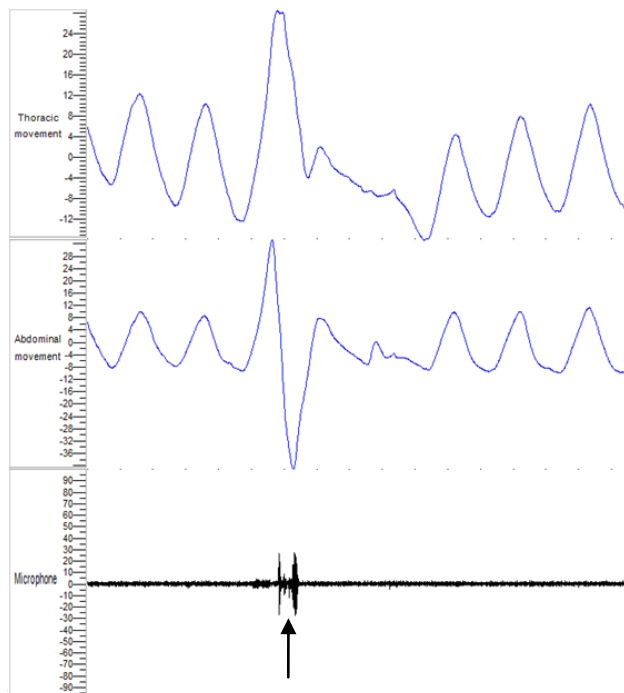

**B**

Supplement: MOESM6 [file 9623250]
